# Supplementary material for: Effect of Colchicine vs Standard Care on Cardiac and Inflammatory Biomarkers and Clinical Outcomes in Patients Hospitalized With Coronavirus Disease 2019: The GRECCO-19 Randomized Clinical Trial
Source: PubMed Central journal article supplement (PMC7315286; doi:10.1001/jamanetworkopen.2020.13136), 2020-06-24
Supplement: jamanetwopen-3-e2013136-s002.pdf [file jamanetwopen-3-e2013136-s002.pdf]

## Supplementary Online Content

Deftereos SG, Giannopoulos G, Vrachatis DA, et al; GRECCO-19 investigators. Effect of colchicine vs standard care on cardiac and inflammatory biomarkers and clinical outcomes in patients hospitalized with coronavirus disease 2019: the GRECCO-19 randomized clinical trial. *JAMA Netw Open*. 2020;3(6):e2013136. doi:10.1001/jamanetworkopen.2020.13136

**eFigure.** Levels of High-Sensitivity Troponin, D-Dimer, and C-Reactive Protein in the 2 Groups

**eTable.** Laboratory Evaluations at Baseline Plus Maximum or Minimum Values

This supplementary material has been provided by the authors to give readers additional information about their work.

eFigure. Levels of High-Sensitivity Troponin, D-Dimer, and C-Reactive Protein in the 2 Groups

The thick horizontal line indicates the median, the box corresponds to the interquartile range and the whiskers to the range, bar outliers, which are represented by dots. The p values correspond to the Mann-Whitney U test for independent samples.

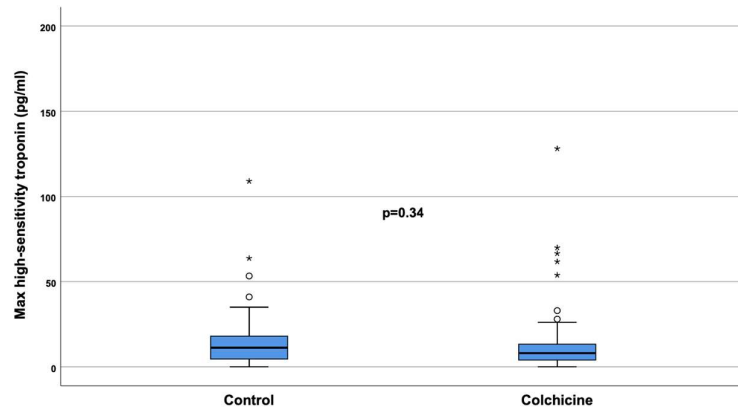

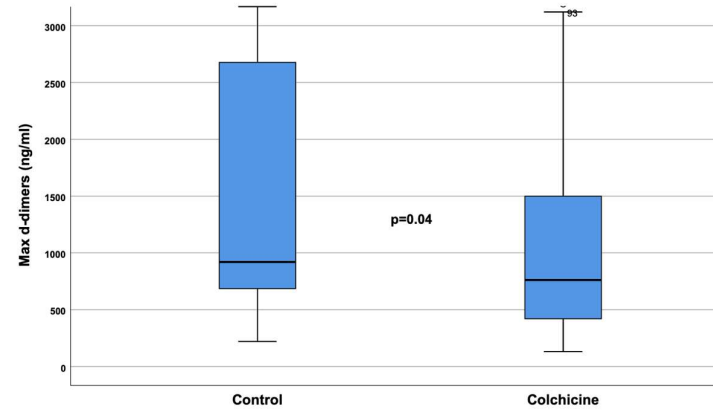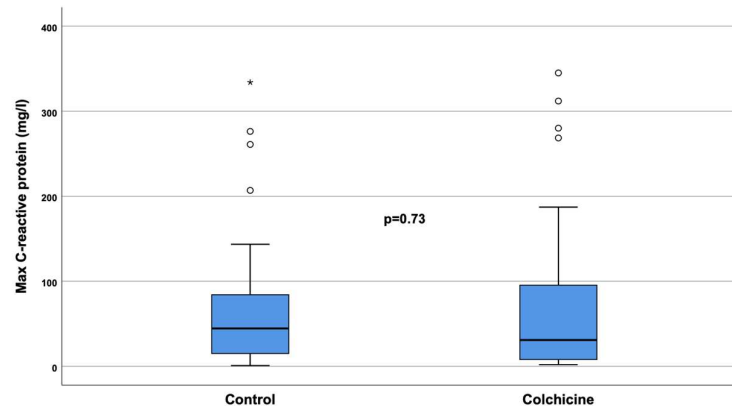

| <b>eTable. Laboratory Evaluations at Baseline Plus Maximum or Minimum Values</b> |                           |                              |                 |     |                                 |                              |                 |
|----------------------------------------------------------------------------------|---------------------------|------------------------------|-----------------|-----|---------------------------------|------------------------------|-----------------|
|                                                                                  | <b>Baseline</b>           |                              |                 |     | <b>Maximum or Minimum Value</b> |                              |                 |
|                                                                                  | <b>Control<br/>(N=50)</b> | <b>Colchicine<br/>(N=55)</b> | <b><i>p</i></b> |     | <b>Control<br/>(N=50)</b>       | <b>Colchicine<br/>(N=55)</b> | <b><i>p</i></b> |
| Temperature - °C                                                                 | 37.7 (37.5 – 38.1)        | 37.7 (37.5 – 38.1)           | 0.875           | max | 36.9 (36.6 - 37.7)              | 37.0 (36.8 - 37.8)           | 0.246           |
| Hemoglobin– g/dl                                                                 | 12.8 (11.2 – 14.5)        | 12.7 (11.5- 14.1)            | 0.552           | min | 12.3 (10.8 – 13.6)              | 11.7 (10.4 – 13.3)           | 0.572           |
| White Blood Cell count - /µl                                                     | 5784 (4173 – 8163)        | 5480 (4820 – 6830)           | 1.000           | max | 7189 (5490 - 9040)              | 6366 (5370 - 8240)           | 0.148           |
| Neutrophils - %                                                                  | 70.2 (58.6 – 79.9)        | 67.8 (62.7 – 76.3)           | 0.871           | max | 76.9 (66.2 - 80.5)              | 67.8 (61.8 - 79.1)           | 0.092           |
| Lymphocytes - %                                                                  | 19.3 (12.6 – 29.2)        | 23.2 (14.9 – 27.4)           | 0.778           | max | 31.6 (21.0 - 38.0)              | 31.6 (21.8 - 39.3)           | 0.705           |
| Macrophages - %                                                                  | 8.0 (4.3 – 9.2)           | 7.6 (6.2 – 8.7)              | 0.825           | max | 9.4 (8.0 - 11.7)                | 10.2 (8.4 - 11.9)            | 0.332           |
| Eosinophils - %                                                                  | 0.40 (0.15- 1.28)         | 0.65 (0.18 – 1.80)           | 0.383           | max | 2.7 (1.6 – 4.5)                 | 2.5 (1.4 - 3.7)              | 0.742           |
| Lymphocyte count - /µl                                                           | 1079 (806-1500)           | 1299 (899-1608)              | 0.315           | max | 920 (676-1293)                  | 1141 (796-1477)              | 0.109           |
| Platelet count – 10 <sup>3</sup> /µl                                             | 207 (168 – 326)           | 221 (169 - 327)              | 0.812           | min | 213 (148 – 261)                 | 225 (164 – 296)              | 0.321           |
| Glucose – mg/dl                                                                  | 106 (91 – 126)            | 100 (88 – 125)               | 0.543           | max | 138 (113 – 163)                 | 119 (98 – 194)               | 0.058           |
| Estimated GFR -<br>ml/min/1.73m <sup>2</sup>                                     | 93 (64 – 118)             | 99 (76 – 128)                | 0.149           | min | 86.7 (55.8-114.3)               | 100.9 (64.2-120.5)           | 0.209           |
| Aspartate Transaminase - IU/l                                                    | 34 (23 – 52)              | 30 (21 – 42)                 | 0.245           | max | 48 (29 – 71)                    | 46 (35 – 60)                 | 0.760           |
| Alanine Transaminase – IU/l                                                      | 35 (18 – 49)              | 25 (17 – 43)                 | 0.201           | max | 53 (29 – 88)                    | 56 (35 – 78)                 | 0.997           |
| Lactate Dehydrogenase – IU/l                                                     | 280 (224 - 405)           | 251 (196 – 350)              | 0.160           | max | 315 (235 - 477)                 | 315 (219 – 415)              | 0.535           |
| Creatine Phosphokinase –<br>IU/l                                                 | 80 (55 – 133)             | 80 (49 – 164)                | 0.944           | Max | 107 (55 – 179)                  | 105 (55 – 167)               | 0.745           |

|                           |                  |                  |       |     |                   |                  |              |
|---------------------------|------------------|------------------|-------|-----|-------------------|------------------|--------------|
| C-Reactive Protein – mg/l | 40 (12 – 95)     | 36 (10-67)       | 0.349 | max | 45 (14 – 89)      | 31 (8 – 98)      | 0.729        |
| hs-troponin – pg/ml       | 7.0 (3.5 – 18.5) | 8.0 (4.0 – 12.3) | 0.749 | max | 11.2 (4.3 – 19.3) | 8.0 (4.0 – 13.5) | 0.337        |
| D-dimers– ng/ml           | 596 (395 – 1005) | 520 (283 – 939)  | 0.362 | max | 920 (678 - 2766)  | 761 (408 - 1588) | <b>0.041</b> |
