# Supplementary material for: Effect of Colchicine vs Standard Care on Cardiac and Inflammatory Biomarkers and Clinical Outcomes in Patients Hospitalized With Coronavirus Disease 2019: The GRECCO-19 Randomized Clinical Trial
Source: PubMed Central journal article supplement (PMC7315286; doi:10.1001/jamanetworkopen.2020.13136), 2020-06-24
Supplement: jamanetwopen-3-e2013136-s003.pdf [file jamanetwopen-3-e2013136-s003.pdf]

## Data Sharing Statement

Deftereos. Effect of Colchicine vs Standard Care on Cardiac and Inflammatory Biomarkers and Clinical Outcomes in Patients Hospitalized With Coronavirus Disease 2019. *JAMA Netw Open*. Published June 24, 2020. 10.1001/jamanetworkopen.2020.13136

### Data

**Data available:** Yes

**Data types:** Deidentified participant data

**How to access data:** [spdeftereos@gmail.com](mailto:spdeftereos@gmail.com)

**When available:** With publication

### Supporting Documents

**Document types:** None

### Additional Information

**Who can access the data:** Researchers whose proposed use of the data has been approved

**Types of analyses:** Any purpose

**Mechanisms of data availability:** With investigator support, after approval of a proposal with a signed data access agreement
